# Supplementary material for: Cervical HPV Infections, Sexually Transmitted Bacterial Pathogens and Cytology Findings—A Molecular Epidemiology Study
Source: MDPI journal article supplement (doi:10.3390/pathogens12111347), 2023-11-14
Supplement: s1 [file s1]

## Supplement

**Table S1: Distribution of bacterial STIs (other than HPV) expression in relation to HPV positivity (any type, low risk, high risk or concurrent low/high risk genotypes).**

| STIs                      | Total           | HPV (+)<br>n=351 (25.6%) | HPV (-)<br>n=1020<br>(74.40%) | OR (95% CI) (p)                                    | HPV HR<br>(+)<br>n=293<br>(21.37%) | HPV HR (-)<br>n=1078<br>(78.63%) | OR (95% CI) (p)                                    | HPV LR<br>(+)<br>n=100<br>(7.29%) | HPV LR (-)<br>n=1271<br>(92.71%) | OR (95% CI) (p)                                     | HPV<br>Both HR<br>& LR (+)<br>n=42<br>(3.06%) | HPV Both HR<br>& LR (-)<br>n=1329<br>(96.94%) | OR (95% CI)<br>(p)                                 |
|---------------------------|-----------------|--------------------------|-------------------------------|----------------------------------------------------|------------------------------------|----------------------------------|----------------------------------------------------|-----------------------------------|----------------------------------|-----------------------------------------------------|-----------------------------------------------|-----------------------------------------------|----------------------------------------------------|
| STIs (+) n (%)            | 460<br>(33.55)  | 178 (38.7)               | 282 (61.30)                   | <b>2.69 (2.10-3.46)</b><br><br>( <b>&lt;0.05</b> ) | 152 (33.04)                        | 308 (66.96)                      | <b>2.70 (2.07-3.51)</b><br><br>( <b>&lt;0.05</b> ) | 54 (11.74)                        | 406 (88.26)                      | <b>2.50 (1.66-3.77)</b><br><br>( <b>&lt;0.05</b> )  | 28 (6.09)                                     | 432 (93.91)                                   | <b>4.15 (2.16-7.97)</b><br><br>( <b>&lt;0.05</b> ) |
| STIs (-) n (%)            | 911<br>(66.45)  | 173 (18.99)              | 738 (81.01)                   |                                                    | 141 (48.12)                        | 770 (84.52)                      |                                                    | 46 (5.05)                         | 865 (94.95)                      |                                                     | 14 (1.54)                                     | 897 (98.46)                                   |                                                    |
|                           | RR              | 2.04 (1.71-2.43)         | 0.76 (0.70-0.82)              | <b>x<sup>2</sup> p&lt;.0001</b>                    | 2.13 (1.75-2.61)                   | 0.79 (0.74-0.85)                 | <b>x<sup>2</sup> p&lt;.0001</b>                    | 2.32<br>(1.59-3.39)               | 0.93 (0.90-0.96)                 | <b>x<sup>2</sup> p &lt;.0001</b>                    | 3.96<br>(2.12-7.45)                           | 0.95 (0.93-0.98)                              | <b>x<sup>2</sup> p &lt;.0001</b>                   |
| Chlamydia T<br>(+) n (%)  | 35<br>(2.55)    | 18 (51.43)               | 17 (48.57)                    | <b>3.19 (1.62-6.26)</b><br><br>( <b>&lt;0.05</b> ) | 14 (40.00)                         | 21 (60.00)                       | <b>2.53 (1.27-5.03)</b><br><br>( <b>&lt;0.05</b> ) | 8 (22.86)                         | 27 (77.14)                       | <b>4.01 (1.77-9.07)</b><br><br>( <b>&lt;0.05</b> )  | 4 (11.43)                                     | 31 (88.57)                                    | <b>4.41 (1.48-13.11)</b> ( <b>&lt;0.05</b> )       |
| Chlamydia T<br>(-) n (%)  | 1336<br>(97.45) | 333 (24.93)              | 1003 (75.07)                  |                                                    | 279 (20.88)                        | 1057 (79.12)                     |                                                    | 92 (6.89)                         | 1244 (93.11)                     |                                                     | 38 (2.84)                                     | 1298 (97.16)                                  |                                                    |
|                           | RR              | 2.06 (1.48-2.88)         | 0.65 (0.46-0.91)              | <b>x<sup>2</sup> p=0.0005</b>                      | 1.92 (1.26-2.91)                   | 0.76 (0.58-0.10)                 | <b>x<sup>2</sup> p&lt;0.01</b>                     | 3.32<br>(1.75-6.29)               | 0.83 (0.69-0.99)                 | <b>x<sup>2</sup> p&lt;0.0005</b>                    | 4.02<br>(1.52-10.64)                          | 0.91 (0.81-1.03)                              | <b>x<sup>2</sup> p&lt;0.005</b>                    |
| Mycoplasma<br>H (+) n (%) | 99<br>(7.22)    | 42 (42.42)               | 57 (57.58)                    | <b>2.30 (1.51-3.49)</b><br><br>( <b>&lt;0.05</b> ) | 33 (33.33)                         | 66 (66.67)                       | <b>1.95 (1.25-3.02)</b><br><br>( <b>&lt;0.05</b> ) | 15 (15.15)                        | 84 (84.85)                       | <b>2.49 (1.38-4.51)</b><br><br>( <b>p&lt;0.05</b> ) | 6 (6.06)                                      | 93 (93.94)                                    | 2.22 (0.91-5.39)<br><br>(p>0.05)                   |
| Mycoplasma<br>H (-) n (%) | 1272<br>(92.78) | 309 (24.29)              | 963 (70.24)                   |                                                    | 260 (20.44)                        | 1012 (79.56)                     |                                                    | 85 (6.68)                         | 1187 (93.32)                     |                                                     | 36 (2.83)                                     | 1236 (97.17)                                  |                                                    |

|                          |              |                  |                  |                                     |                  |                  |                                     |                  |                  |                                     |                  |                  |                                     |
|--------------------------|--------------|------------------|------------------|-------------------------------------|------------------|------------------|-------------------------------------|------------------|------------------|-------------------------------------|------------------|------------------|-------------------------------------|
|                          | RR           | 1.75 (1.36-2.24) | 0.76 (0.64-0.90) | <b>x<sup>2</sup> p &lt;.0001</b>    | 1.63 (1.21-2.20) | 0.84 (0.73-0.97) | <b>x<sup>2</sup> p&lt;0.005</b>     | 2.27 (1.36-3.77) | 0.91 (0.84-0.99) | <b>x<sup>2</sup> p&lt;0.005</b>     | 2.14 (0.92-4.96) | 0.97 (0.92-1.02) | x-square p=0.0724                   |
| Mycoplasma G (+) n (%)   | 11 (0.8%)    | 3 (27.27)        | 8 (72.73)        | 1.09 (0.29-4.13)<br>(p>0.05)        | 3 (27.27)        | 8 (72.73)        | 1.38 (0.36-5.25)<br>(p>0.05)        | 0 (0)            | 11 (100)         | NA                                  | 0 (0)            | 11 (100)         | NA                                  |
| Mycoplasma G (-) n (%)   | 1360 (99.2)  | 348 (25.59)      | 1012 (74.41)     |                                     | 290 (21.32)      | 1070 (78.68)     |                                     | 100 (7.35)       | 1260 (92.65)     |                                     | 42 (3.09)        | 1318 (96.91)     |                                     |
|                          | RR           | 1.07 (0.40-2.81) | 0.98 (0.68-1.41) | <b>x<sup>2</sup> p=0.8985</b>       | 1.28 (0.48-3.38) | 0.92 (0.64-1.33) | <b>x<sup>2</sup> p=0.6317</b>       | NA               | 1.08 (1.06-1.10) | <b>x<sup>2</sup> p=0.3503</b>       | NA               | 1.03 (1.02-1.04) | <b>x<sup>2</sup> p=0.5539</b>       |
| Ureaplasma spp (+) n (%) | 350 (25.23)  | 135 (38.57)      | 215 (61.43)      | <b>2.34 (1.80-3.04)</b><br>(p<0.05) | 117 (33.43)      | 233 (66.57)      | <b>2.41 (1.83-3.17)</b><br>(p<0.05) | 39 (11.14)       | 311 (88.86)      | <b>1.97 (1.29-3.01)</b><br>(p<0.05) | 21 (6.00)        | 329 (94.00)      | <b>3.04 (1.64-5.64)</b><br>(p<0.05) |
| Ureaplasma spp (-) n (%) | 1021 (74.47) | 216 (21.16)      | 805 (78.84)      |                                     | 176 (17.24)      | 845 (82.76)      |                                     | 61 (5.97)        | 960 (94.03)      |                                     | 21 (2.06)        | 1000 (97.94)     |                                     |
|                          | RR           | 1.82 (1.53-2.18) | 0.78 (0.71-0.85) | <b>x<sup>2</sup> p &lt;.0001</b>    | 1.94 (1.59-2.37) | 0.80 (0.74-0.87) | <b>x<sup>2</sup> p &lt;.0001</b>    | 1.87 (1.27-2.74) | 0.95 (0.91-0.98) | <b>x<sup>2</sup> p&lt;0.005</b>     | 2.92 (1.61-5.28) | 0.96 (0.93-0.99) | <b>x<sup>2</sup> p&lt;0.0005</b>    |

RR: Relative Risk, bold values indicate statistical significance (p<0.05) for correlation of specific STD with HPV infection status.
